# Supplementary material
Source: Frontiers journal article supplement (https://www.frontiersin.org/articles/302638)
Supplement: Table_4.pdf [file Table_4.pdf]

**Supplementary Table 4**

*Clinical characteristics of patients with delayed graft function. N.S.: Non-significant. The variables that were selected for the multivariate analysis are marked in bold.*

| Condition.                          | Delayed graft function |                | Rest of patients |                | p                |
|-------------------------------------|------------------------|----------------|------------------|----------------|------------------|
|                                     | N / mean               | % / se         | N / mean         | % / se         |                  |
| Sex (women)                         | 72                     | (37.7%)        | 233              | (42.4%)        | N.S.             |
| <b>Age (years)</b>                  | <b>52.5</b>            | <b>±0.9</b>    | <b>48</b>        | <b>±0.6</b>    | <b>&lt;0.001</b> |
| Donor age (years)                   | <b>50.5</b>            | <b>±1.2</b>    | <b>44</b>        | <b>±0.8</b>    | <b>&lt;0.001</b> |
| <b>Time on dialysis (months)</b>    | 36.2                   | ±2.8           | 32.6             | ±1.9           | 0.004            |
| Body mass index                     | <b>26.2</b>            | <b>±0.4</b>    | <b>24.7</b>      | <b>±0.2</b>    | <b>&lt;0.001</b> |
| Diabetes mellitus                   | 40                     | (20.9%)        | 83               | (15.1%)        | N.S.             |
| Type 1 Diabetes                     | 6                      | (3.1%)         | 25               | (4.6%)         | N.S.             |
| Type 2 Diabetes                     | 17                     | (8.9%)         | 29               | (5.3%)         | N.S.             |
| Dyslipidemia                        | 95                     | (49.7%)        | 263              | (47.9%)        | N.S.             |
| <b>Hypertension</b>                 | <b>153</b>             | <b>(80.1%)</b> | <b>388</b>       | <b>(70.7%)</b> | <b>0.015</b>     |
| <b>Patients IgA aB2GP1 positive</b> | <b>103</b>             | <b>(53.9%)</b> | <b>185</b>       | <b>(33.7%)</b> | <b>&lt;0.001</b> |
| Causes CKD                          |                        |                |                  |                |                  |
| Chronic glomerulonephritis          | 52                     | (27.2%)        | 158              | (28.8%)        | N.S.             |
| Interstitial kidney disease         | 21                     | (11%)          | 79               | (14.4%)        | N.S.             |
| Nephroangiosclerosis                | 21                     | (11%)          | 39               | (7.1%)         | N.S.             |
| Polycystic kidney disease           | 28                     | (14.7%)        | 90               | (16.4%)        | N.S.             |
| Diabetes mellitus                   | 17                     | (8.9%)         | 39               | (7.1%)         | N.S.             |
| Unknown                             | 26                     | (13.6%)        | 86               | (15.7%)        | N.S.             |
| Other                               | 26                     | (13.6%)        | 58               | (10.6%)        | N.S.             |
| Transplant-associated factors       |                        |                |                  |                |                  |
| Previous kidney transplant          | 36                     | (18.8%)        | 74               | (13.5%)        | N.S.             |
| PRA at time of transplant >50%      | 4                      | (2.1%)         | 20               | (3.6%)         | N.S.             |
| Historical PRA >50%                 | 18                     | (9.4%)         | 55               | (10%)          | N.S.             |
| <b>Cold ischemia time (hours)</b>   | <b>20.5</b>            | <b>±0.4</b>    | <b>19.3</b>      | <b>±0.2</b>    | <b>0.001</b>     |
